# Supplementary material for: Participation in Accountable Care Organizations Among Hospitals Offering Substance Use Disorder and Mental Health Services
Source: Atypon-hosted journal article supplement (doi:10.1176/appi.ps.201800248), 2018-08-28
Supplement: appi.ps.201800248.ds001.pdf [file appi.ps.201800248.ds001.pdf]

| <b>Descriptive characteristics of hospitals that participate in ACOs versus hospitals that do not participate in ACOs, 2016</b> |                                        |          |                                            |          |                   |
|---------------------------------------------------------------------------------------------------------------------------------|----------------------------------------|----------|--------------------------------------------|----------|-------------------|
|                                                                                                                                 | <b>ACO hospitals<br/>N = 1313, 36%</b> |          | <b>Non-ACO hospitals<br/>N = 2329, 64%</b> |          | <b>p Value</b>    |
|                                                                                                                                 | <b>N</b>                               | <b>%</b> | <b>N</b>                                   | <b>%</b> |                   |
| <b>Hospital type</b>                                                                                                            |                                        |          |                                            |          | <b>&lt;0.0001</b> |
| Behavioral health specialty hospitals                                                                                           | 21                                     | 8%       | 241                                        | 92%      |                   |
| General hospitals <i>with</i> behavioral health services                                                                        | 856                                    | 46%      | 1026                                       | 55%      |                   |
| General hospitals <i>without</i> behavioral health services                                                                     | 438                                    | 29%      | 1067                                       | 71%      |                   |
| <b>Total staffed beds</b>                                                                                                       |                                        |          |                                            |          | <b>&lt;0.0001</b> |
| <100                                                                                                                            | 491                                    | 28%      | 1296                                       | 73%      |                   |
| 100-399                                                                                                                         | 585                                    | 41%      | 857                                        | 59%      |                   |
| ≥ 400                                                                                                                           | 239                                    | 57%      | 181                                        | 43%      |                   |
| <b>Teaching hospital</b>                                                                                                        |                                        |          |                                            |          | <b>&lt;0.0001</b> |
| Yes                                                                                                                             | 706                                    | 48%      | 769                                        | 52%      |                   |
| No                                                                                                                              | 609                                    | 28%      | 1565                                       | 72%      |                   |
| <b>Rural hospital</b>                                                                                                           |                                        |          |                                            |          | <b>&lt;0.0001</b> |
| Yes                                                                                                                             | 188                                    | 24%      | 606                                        | 76%      |                   |
| No                                                                                                                              | 1127                                   | 40%      | 1728                                       | 61%      |                   |
| <b>Region</b>                                                                                                                   |                                        |          |                                            |          | <b>&lt;0.0001</b> |
| New England                                                                                                                     | 93                                     | 66%      | 47                                         | 34%      |                   |
| Mid-Atlantic                                                                                                                    | 152                                    | 46%      | 181                                        | 54%      |                   |
| South Atlantic                                                                                                                  | 198                                    | 37%      | 341                                        | 63%      |                   |
| East North Central                                                                                                              | 300                                    | 50%      | 303                                        | 50%      |                   |
| East South Central                                                                                                              | 36                                     | 16%      | 183                                        | 84%      |                   |
| West North Central                                                                                                              | 192                                    | 34%      | 383                                        | 67%      |                   |
| West South Central                                                                                                              | 140                                    | 22%      | 504                                        | 78%      |                   |
| Mountain                                                                                                                        | 80                                     | 32%      | 171                                        | 68%      |                   |
| Pacific                                                                                                                         | 124                                    | 36%      | 221                                        | 64%      |                   |
| <b>Hospital ownership</b>                                                                                                       |                                        |          |                                            |          | <b>&lt;0.0001</b> |
| Nonprofit, nongovernment                                                                                                        | 1090                                   | 47%      | 1213                                       | 53%      |                   |
| Nonfederal government                                                                                                           | 153                                    | 19%      | 636                                        | 81%      |                   |
| For-profit, nongovernment                                                                                                       | 72                                     | 13%      | 485                                        | 87%      |                   |

| <b>Logistic regression assessing hospital characteristics associated with ACO participation among behavioral health specialty hospitals and general hospitals, 2016</b> |           |                      |
|-------------------------------------------------------------------------------------------------------------------------------------------------------------------------|-----------|----------------------|
|                                                                                                                                                                         | <b>OR</b> | <b>95% CI</b>        |
| <b>Hospital type</b> (reference: general hospitals <i>without</i> behavioral health services)                                                                           |           |                      |
| Behavioral health specialty hospitals                                                                                                                                   | 0.252     | <b>0.155 – 0.410</b> |
| General hospitals <i>with</i> behavioral health services                                                                                                                | 1.218     | <b>1.024 – 1.449</b> |
| <b>Total staffed beds</b> (reference: <100)                                                                                                                             |           |                      |
| 100-399                                                                                                                                                                 | 1.233     | <b>1.011 – 1.504</b> |
| ≥ 400                                                                                                                                                                   | 1.908     | <b>1.423 – 2.558</b> |
| <b>Teaching hospital</b> (reference: non-teaching hospital)                                                                                                             |           |                      |
| <b>Rural hospital</b> (reference: non-rural hospital)                                                                                                                   | 0.674     | <b>0.540 – 0.841</b> |
| <b>Region</b> (reference: West South Central)                                                                                                                           |           |                      |
| New England                                                                                                                                                             | 3.545     | <b>2.307 – 5.448</b> |
| East North Central                                                                                                                                                      | 2.046     | <b>1.562 – 2.680</b> |
| West North Central                                                                                                                                                      | 1.474     | <b>1.115 – 1.949</b> |
| Mid-Atlantic                                                                                                                                                            | 1.304     | 0.951 – 1.788        |
| South Atlantic                                                                                                                                                          | 1.275     | 0.964 – 1.685        |
| Mountain                                                                                                                                                                | 1.236     | 0.872 – 1.752        |
| Pacific                                                                                                                                                                 | 1.100     | 0.805 – 1.503        |
| East South Central                                                                                                                                                      | 0.517     | <b>0.339 – 0.790</b> |
| <b>Hospital ownership</b> (reference: nonprofit, nongovernment)                                                                                                         |           |                      |
| Nonfederal government                                                                                                                                                   | 0.412     | <b>0.334 – 0.508</b> |
| For-profit, nongovernment                                                                                                                                               | 0.254     | <b>0.192 – 0.336</b> |
